# Supplementary material for: Examining the intersection of child protection and public housing: development, health and justice outcomes using linked administrative data
Source: HighWire-hosted journal article supplement (doi:10.1136/bmjopen-2021-057284), 2022-06-01
Supplement: bmjopen-2021-057284supp001_data_supplement.pdf [file bmjopen-2021-057284supp001_data_supplement.pdf]

### Supplementary material: Youth Justice supervision for different BEBOLD birth cohorts allowing for different follow up periods

**Table 1. Youth Justice supervision of children with at least one notification to child protection before age 5 with different types of housing system contact, born from 1999-2004**

|                                                                   | No housing contact<br>(n = 741) |       | Short-term private rental assistance only <sup>a</sup><br>(n = 223) |       | Listed on a public housing waitlist <sup>b</sup><br>(n = 512) |       | Ever in public housing <sup>c</sup><br>(n = 632) |       |
|-------------------------------------------------------------------|---------------------------------|-------|---------------------------------------------------------------------|-------|---------------------------------------------------------------|-------|--------------------------------------------------|-------|
|                                                                   | n                               | % col | n                                                                   | % col | n                                                             | % col | n                                                | % col |
| <b>Ever supervised by Youth Justice before age 17<sup>d</sup></b> |                                 |       |                                                                     |       |                                                               |       |                                                  |       |
| Yes                                                               | 12                              | 1.6   | 8                                                                   | 3.6   | 24                                                            | 4.7   | 63                                               | 10.0  |
| No                                                                | 729                             | 98.4  | 215                                                                 | 96.4  | 488                                                           | 95.3  | 569                                              | 90.0  |
| <b>Entered custody before age 17<sup>d</sup></b>                  |                                 |       |                                                                     |       |                                                               |       |                                                  |       |
| Yes                                                               | 10                              | 1.3   | 5                                                                   | 2.2   | 18                                                            | 3.5   | 44                                               | 7.0   |
| No                                                                | 731                             | 98.7  | 218                                                                 | 97.8  | 494                                                           | 96.5  | 588                                              | 93.0  |
| <b>Ever supervised by Youth Justice before age 15<sup>e</sup></b> | <b>n = 2,293</b>                |       | <b>n = 707</b>                                                      |       | <b>n = 1,549</b>                                              |       | <b>n = 2,132</b>                                 |       |
| Yes                                                               | 29                              | 1.3   | 22                                                                  | 3.1   | 53                                                            | 3.4   | 163                                              | 7.6   |
| No                                                                | 2,264                           | 98.7  | 685                                                                 | 96.9  | 1,496                                                         | 96.6  | 1,969                                            | 92.4  |
| <b>Entered custody before age 15<sup>e</sup></b>                  |                                 |       |                                                                     |       |                                                               |       |                                                  |       |
| Yes                                                               | 25                              | 1.1   | 16                                                                  | 2.3   | 40                                                            | 2.6   | 127                                              | 6.0   |
| No                                                                | 2,268                           | 98.9  | 691                                                                 | 97.7  | 1,509                                                         | 97.4  | 2,005                                            | 94.0  |
| <b>Ever supervised by Youth Justice before age 14<sup>f</sup></b> | <b>n = 3,200</b>                |       | <b>n = 1,013</b>                                                    |       | <b>n = 2,038</b>                                              |       | <b>n = 2,953</b>                                 |       |
| Yes                                                               | 33                              | 1.0   | 24                                                                  | 2.4   | 58                                                            | 2.8   | 195                                              | 6.6   |
| No                                                                | 3,167                           | 99.0  | 989                                                                 | 97.6  | 1,980                                                         | 97.2  | 2,758                                            | 93.4  |
| <b>Entered custody before age 14<sup>f</sup></b>                  |                                 |       |                                                                     |       |                                                               |       |                                                  |       |
| Yes                                                               | 29                              | 0.9   | 18                                                                  | 1.8   | 45                                                            | 2.2   | 157                                              | 5.3   |
| No                                                                | 3,171                           | 99.1  | 995                                                                 | 98.2  | 1,993                                                         | 97.8  | 2,796                                            | 94.7  |
| <b>Ever supervised by Youth Justice before age 12<sup>g</sup></b> | <b>n = 5,292</b>                |       | <b>n = 1,729</b>                                                    |       | <b>n = 3,046</b>                                              |       | <b>n = 4,556</b>                                 |       |
| Yes                                                               | 39                              | 0.7   | 26                                                                  | 1.5   | 64                                                            | 2.1   | 221                                              | 4.9   |
| No                                                                | 5,253                           | 99.3  | 1,703                                                               | 98.5  | 2,982                                                         | 97.9  | 4,335                                            | 95.1  |
| <b>Entered custody before age 12<sup>g</sup></b>                  |                                 |       |                                                                     |       |                                                               |       |                                                  |       |
| Yes                                                               | 35                              | 0.7   | 20                                                                  | 1.2   | 50                                                            | 1.6   | 182                                              | 4.0   |
| No                                                                | 5,257                           | 99.3  | 1,709                                                               | 98.8  | 2,996                                                         | 98.4  | 4,374                                            | 96.0  |

<sup>a</sup> Excludes children who had been in, or on a waitlist for, public housing

<sup>b</sup> Includes children who had been in families receiving short-term private rental assistance but excludes children who had been in public housing

<sup>c</sup> Includes all children who had ever been in public housing

<sup>d</sup> Includes children born in 1999 only to ensure follow-up time for Youth Justice to age 17

<sup>e</sup> Includes children born in 1999-2001 only with follow-up time for Youth Justice to age 15

<sup>f</sup> Includes children born in 1999-2002 only with follow-up time for Youth Justice to age 14

<sup>g</sup> Includes children born in 1999-2004 only with follow-up time for Youth Justice to age 12
